# Supplementary material for: Role of sesquiterpenes in biogenic new particle formation
Source: PubMed Central journal article supplement — Sci Adv. 2023 Sep 8;9(36):eadi5297. doi: 10.1126/sciadv.adi5297 (PMC10491295; doi:10.1126/sciadv.adi5297), 2023-09-08
Supplement: sciadv.adi5297_sm.pdf [file sciadv.adi5297_sm.pdf]

Supplementary Materials for  
**Role of sesquiterpenes in biogenic new particle formation**

Lubna Dada *et al.*

Corresponding author: Imad El Haddad, [imad.el-haddad@psi.ch](mailto:imad.el-haddad@psi.ch); Markku Kulmala, [markku.kulmala@helsinki.fi](mailto:markku.kulmala@helsinki.fi)

*Sci. Adv.* **9**, eadi5297 (2023)  
DOI: 10.1126/sciadv.adi5297

**This PDF file includes:**

Figs. S1 to S9  
Tables S1 and S2  
References

**Table S1 List of experimental runs.** Summary of the runs included in this study showing experimental conditions, injection mixing ratios and median measured concentrations of precursor vapours. Pure  $\alpha$ -pinene runs (1, 2, 3) marked with a (\*) are from Simon *et al.*(30). Most runs are performed at 5°C and 40% RH, experiments with different conditions are marked in **bold**. Steady state concentrations for runs 27 and 28 are approximated due to missing measurements and are marked with (•).

| System                                               | Run       | RH (%)    | Temp (°C) | Concentration (ppbv) |      | injected concentrations (pptv) |          |                        | steady state concentration (ppt) |          |                        |
|------------------------------------------------------|-----------|-----------|-----------|----------------------|------|--------------------------------|----------|------------------------|----------------------------------|----------|------------------------|
|                                                      |           |           |           | NO <sub>2</sub>      | NO   | $\alpha$ -pinene               | isoprene | $\beta$ -caryophyllene | $\alpha$ -pinene                 | isoprene | $\beta$ -caryophyllene |
| $\alpha$ -pinene                                     | 1*        | 40        | 5         | 0                    | 0    | 600                            | 0        | 0                      | 323.3                            | 0.0      | 0.0                    |
|                                                      | 2*        | 40        | 5         | 0                    | 0    | 1200                           | 0        | 0                      | 592.5                            | 0.0      | 0.0                    |
|                                                      | 3*        | 40        | 5         | 0                    | 0    | 2400                           | 0        | 0                      | 1123.8                           | 0.0      | 0.0                    |
|                                                      | 4         | 40        | 5         | 0                    | 0    | 1200                           | 0        | 0                      | 666.6                            | 0.0      | 0.0                    |
|                                                      | 5         | 40        | 5         | 0                    | 0    | 2400                           | 0        | 0                      | 1165.7                           | 0.0      | 0.0                    |
| $\alpha$ -pinene + isoprene                          | 6         | 40        | 5         | 0                    | 0    | 600                            | 10000    | 0                      | 310.2                            | 3988.0   | 0.0                    |
|                                                      | 7         | 40        | 5         | 0                    | 0    | 1200                           | 10000    | 0                      | 609.8                            | 3858.5   | 0.0                    |
|                                                      | 8         | 40        | 5         | 0                    | 0    | 2400                           | 10000    | 0                      | 1116.4                           | 3584.6   | 0.0                    |
| $\beta$ -caryophyllene                               | 9         | 40        | 5         | 0                    | 0    | 0                              | 0        | 100                    | 0.0                              | 0.0      | 1.8                    |
|                                                      | 10        | 40        | 5         | 0                    | 0    | 0                              | 0        | 200                    | 0.0                              | 0.0      | 3.3                    |
|                                                      | 11        | 40        | 5         | 0                    | 0    | 0                              | 0        | 400                    | 0.0                              | 0.0      | 6.6                    |
| $\alpha$ -pinene + isoprene + $\beta$ -caryophyllene | 12        | 40        | 5         | 0                    | 0    | 600                            | 5000     | 100                    | 300.0                            | 1471.0   | 3.0                    |
|                                                      | 13        | 40        | 5         | 0                    | 0    | 1200                           | 10000    | 200                    | 585.3                            | 2751.8   | 7.1                    |
|                                                      | 14        | 40        | 5         | 0                    | 0    | 2400                           | 20000    | 400                    | 974.1                            | 4577.9   | 15.8                   |
|                                                      | 15        | 40        | <b>25</b> | 0.26                 | 0.01 | 600                            | 5000     | 100                    | 215.2                            | 445.5    | 1.1                    |
|                                                      | 16        | 40        | <b>25</b> | 0.24                 | 0.01 | 1200                           | 10000    | 200                    | 468.3                            | 851.6    | 2.3                    |
|                                                      | 17        | 40        | <b>25</b> | 0.25                 | 0.01 | 1200                           | 10000    | 200                    | 932.1                            | 1994.2   | 5.1                    |
|                                                      | 18        | <b>65</b> | <b>25</b> | 0.23                 | 0.01 | 600                            | 5000     | 100                    | 241.0                            | 437.7    | 3.8                    |
|                                                      | 19        | <b>65</b> | <b>25</b> | 0.23                 | 0.01 | 1200                           | 10000    | 200                    | 472.8                            | 453.4    | 5.3                    |
|                                                      | 20        | <b>65</b> | <b>25</b> | 0.23                 | 0.02 | 2400                           | 20000    | 400                    | 947.1                            | 564.9    | 9.5                    |
|                                                      | 21        | 40        | 5         | 0.79                 | 0.07 | 600                            | 5000     | 100                    | 235.5                            | 1588.5   | 1.0                    |
|                                                      | 22        | 40        | 5         | 0.35                 | 0.03 | 600                            | 5000     | 100                    | 282.4                            | 1780.9   | 1.1                    |
|                                                      | 23        | 40        | 5         | 0.32                 | 0.02 | 1200                           | 10000    | 200                    | 541.4                            | 3389.2   | 2.3                    |
|                                                      | 24        | 40        | 5         | 0.22                 | 0.01 | 2400                           | 20000    | 400                    | 1049.0                           | 6827.8   | 5.6                    |
|                                                      | 25        | 40        | 5         | 0.21                 | 0.01 | 1200                           | 10000    | 200                    | 670.7                            | 4488.5   | 3.0                    |
|                                                      | 26        | 40        | 5         | 0.25                 | 0.01 | 1200                           | 10000    | 200                    | 662.4                            | 4402.1   | 3.0                    |
| 27                                                   | <b>5</b>  | 5         | 0.23      | 0.00                 | 1200 | 10000                          | 200      | 665 •                  | 9081.0                           | 3.0 •    |                        |
| 28                                                   | <b>90</b> | 5         | 0.31      | 0.02                 | 1200 | 10000                          | 200      | 665 •                  | 1842.3                           | 3.0 •    |                        |

**Table S 2 Volatilities for C<sub>14</sub>H<sub>22</sub>O<sub>x</sub> and C<sub>15</sub>H<sub>22</sub>O<sub>x</sub> oxidized compounds from FIGAERO thermogram analysis.** Measured volatility of common C<sub>14</sub>H<sub>22</sub>O<sub>x</sub> and C<sub>15</sub>H<sub>22</sub>O<sub>x</sub> oxidation products of pure β-caryophyllene (orange) resulting in a β-caryophyllene monomer and of α-pinene + isoprene mixture (blue) resulting in an α-pinene+isoprene dimer. Dimers formed from α-pinene (C<sub>10</sub>) and isoprene (C<sub>5</sub>) result in C<sub>14</sub>H<sub>22</sub>O<sub>x</sub> and C<sub>15</sub>H<sub>22</sub>O<sub>x</sub> compounds which are less volatile than those formed from pure β-caryophyllene (C<sub>15</sub>). Volatilities are given in units of μg/m<sup>3</sup> and cm<sup>-3</sup> for each compound. The number densities in the table are calculated based on the individual molar mass of each compound.

|                                                 | C* (β-caryophyllene:monomer) |                  | C* (α-pinene+isoprene:dimer) |                  |
|-------------------------------------------------|------------------------------|------------------|------------------------------|------------------|
|                                                 | μg m <sup>-3</sup>           | cm <sup>-3</sup> | μg m <sup>-3</sup>           | cm <sup>-3</sup> |
| C <sub>14</sub> H <sub>22</sub> O <sub>7</sub>  |                              |                  | 3.02E-04                     | 6.02E+05         |
| C <sub>14</sub> H <sub>22</sub> O <sub>8</sub>  | 1.55E-03                     | 2.93E+06         | 1.74E-04                     | 3.29E+05         |
| C <sub>14</sub> H <sub>22</sub> O <sub>9</sub>  | 9.77E-04                     | 1.76E+06         | 6.61E-05                     | 1.19E+05         |
| C <sub>14</sub> H <sub>22</sub> O <sub>10</sub> | 1.82E-04                     | 3.13E+05         | 7.41E-06                     | 1.27E+04         |
| C <sub>15</sub> H <sub>22</sub> O <sub>6</sub>  | 3.89E-03                     | 7.85E+06         |                              |                  |
| C <sub>15</sub> H <sub>22</sub> O <sub>7</sub>  | 2.14E-03                     | 4.10E+06         | 7.94E-05                     | 1.52E+05         |
| C <sub>15</sub> H <sub>22</sub> O <sub>8</sub>  | 1.74E-03                     | 3.17E+06         | 6.31E-06                     | 1.15E+04         |
| C <sub>15</sub> H <sub>22</sub> O <sub>9</sub>  | 6.76E-04                     | 1.18E+06         | 5.89E-06                     | 1.02E+04         |
| C <sub>15</sub> H <sub>22</sub> O <sub>10</sub> | 5.50E-05                     | 9.14E+04         | 3.16E-06                     | 5.26E+03         |
| C <sub>15</sub> H <sub>22</sub> O <sub>11</sub> | 2.09E-05                     | 3.33E+04         | 5.50E-08                     | 8.75E+01         |

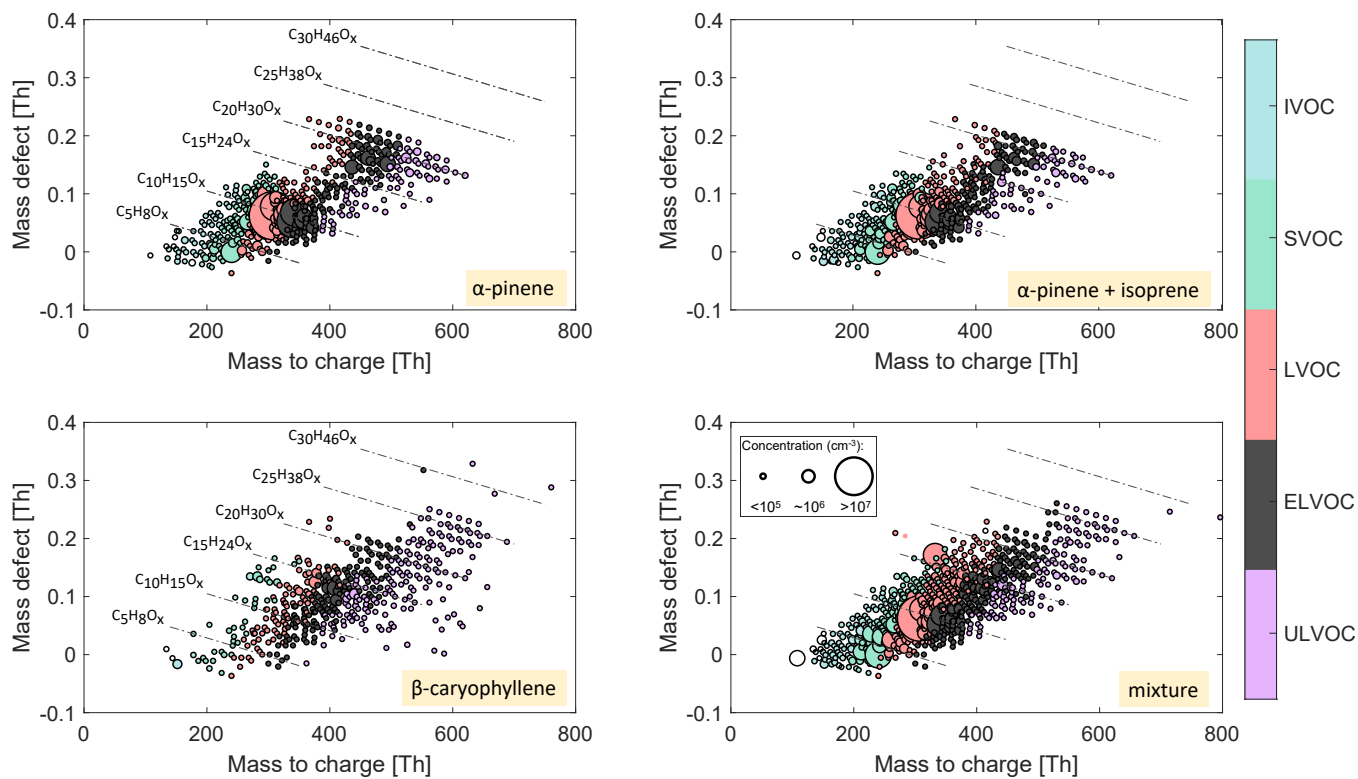

**Figure S1 Chemical composition of BVOC oxidation results measured with  $NO_3$ -CIMS.** Mass defect plots showing the oxidation products during different runs. Here we show example runs of pure components,  $\alpha$ -pinene (run #4) and  $\beta$ -caryophyllene (run #10) as well as mixtures of  $\alpha$ -pinene + isoprene (run #7) and  $\alpha$ -pinene+isoprene+  $\beta$ -caryophyllene (run #13).

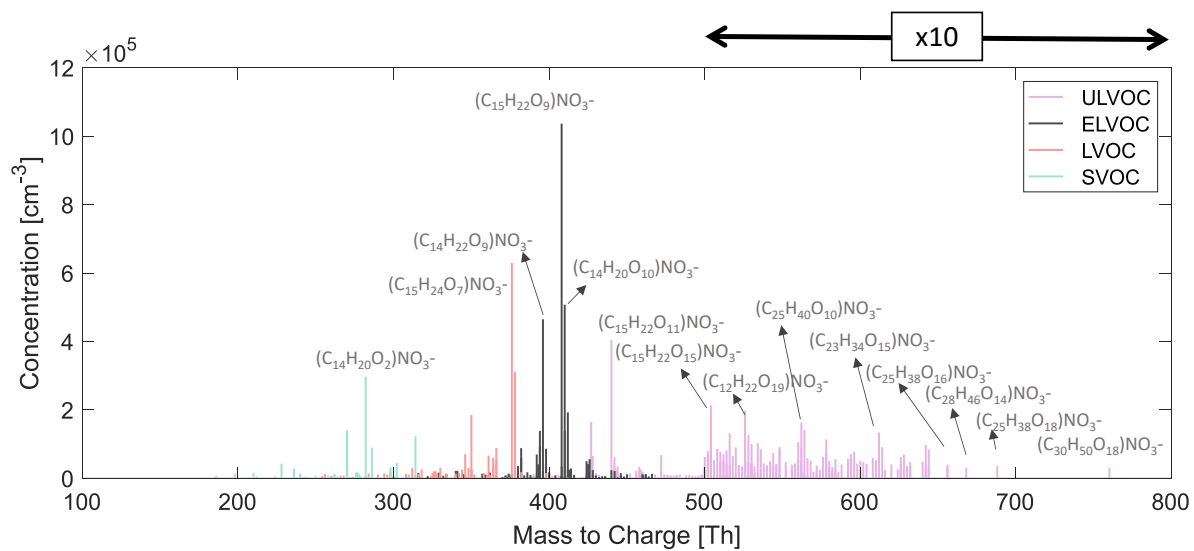

**Figure S2 Chemical composition of  $\beta$ -caryophyllene oxidation products.** Mass spectrum of  $\beta$ -caryophyllene oxidation products measured with  $\text{NO}_3$ -CIMS. Here we show  $\beta$ -caryophyllene ozonolysis run #10. Concentrations of compounds exceeding 500 Th are multiplied by 10.

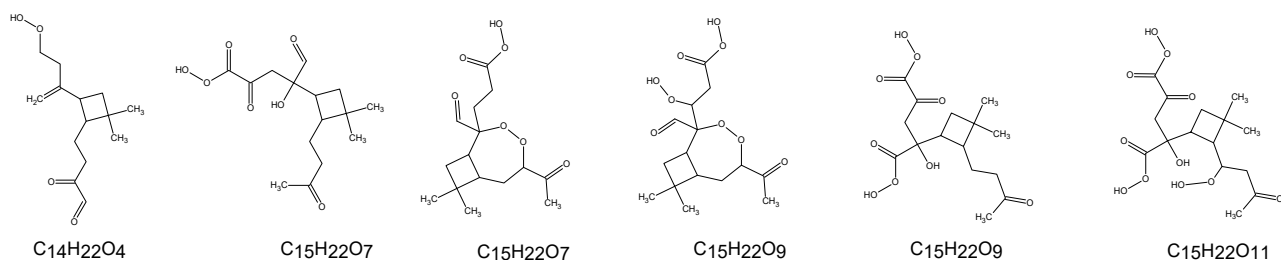

**Figure S3 Assumed structures of  $\beta$ -caryophyllene oxidation products:  $C_{14}H_{22}O_x$  and  $C_{15}H_{22}O_x$ .** The  $\beta$ -caryophyllene autoxidation product structures were drawn according to prototypical reaction schemes based on previous literature on OOM formation in similar systems (26,74-76) and were used in the subsequent SIMPOL model. Briefly, the  $\beta$ -caryophyllene autoxidation subsequent to decomposition of the primary ozonide is propagated by peroxy radical H-shift reactions followed by  $O_2$  additions, with the aldehydic and tertiary hydrogens being easiest to abstract, and the second double bond leading to rapid bridging of  $O_2$  (i.e., endoperoxidation). The oxidation sequence is terminated by abstraction of a hydrogen from a carbon containing hydroperoxy functionality (i.e., C-OOH), leading to ejection of an OH and formation of a carbonyl functional group.

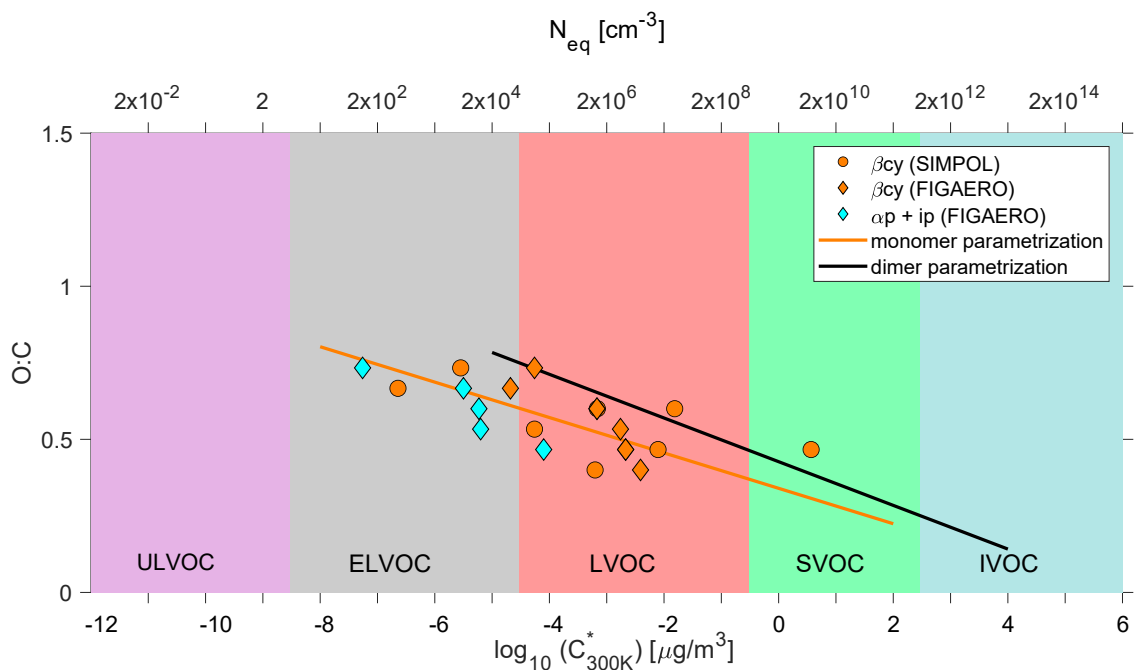

**Figure S4 Volatility model at 300K used in this study.** The volatility is calculated by the group-contribution method SIMPOL for  $\text{C}_{15}\text{H}_{22}\text{O}_x$ . We used the structures shown in Fig. S3 to know the functional groups to use SIMPOL ( $\text{C}_{15}$  monomer and  $\text{C}_{15}$  dimer, in the BVOC mixture most of the  $\text{C}_{15}$  are from the cross dimer). This figure validates our parametrization that in the BVOC mixture  $\text{C}_{15}$  species are monomers. The parametrization can be used if up to  $\text{C}_{15}$  are monomers. The FIGAERO confirms that the molecules are closer to the monomer line. Species larger than  $\text{C}_{15}$  are dimers which include the peroxide groups.

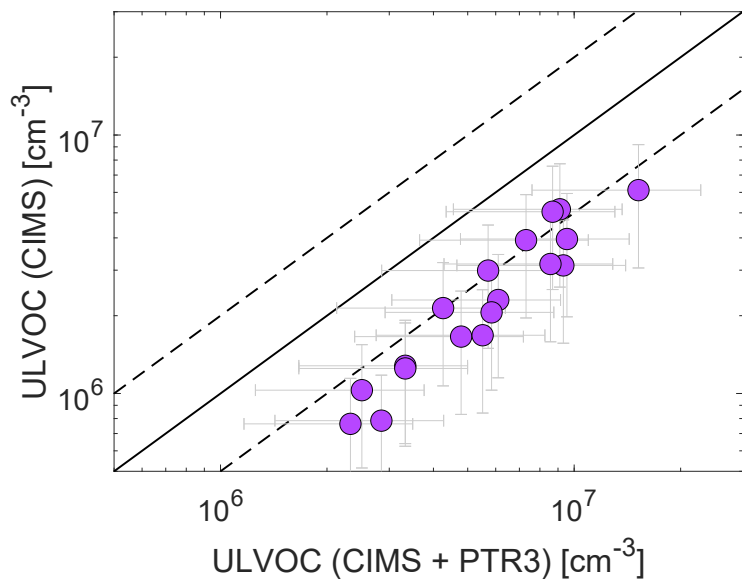

**Figure S5 Concentration of ULVOC parametrized from NO<sub>3</sub>-CIMS data only as a function of ULVOC acquired from NO<sub>3</sub>-CIMS and PTR3 data combined.** The difference appears to be within the error margin, an average of a factor of two higher when including the PTR3 data.



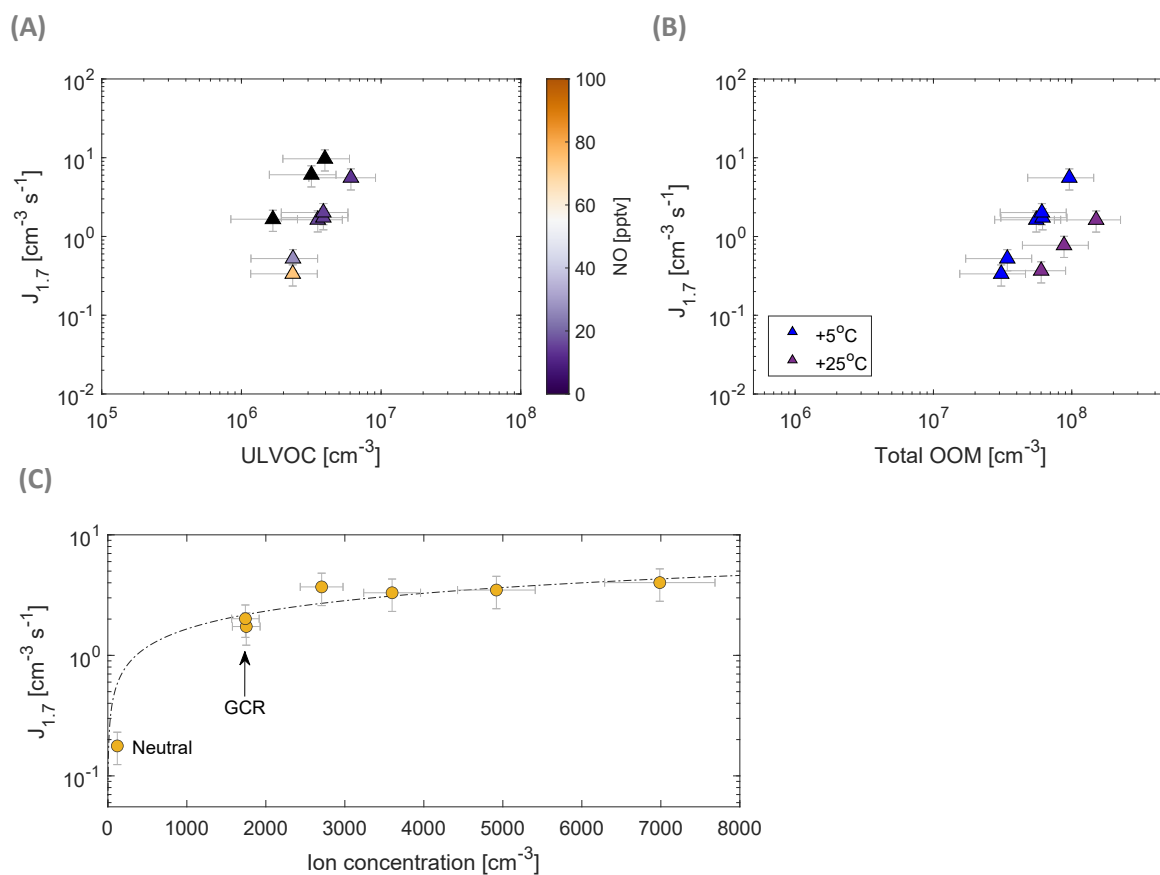

**Figure S6 Effect of atmospheric conditions on particle formation rate.** (A) Mixture runs ( $\alpha$ -pinene+isoprene+ $\beta$ -caryophyllene) at temperature = 5°C and RH = 40%. Particle formation rate ( $J_{1.7}$ ) as a function of ULVOC concentration, without NO are shown in black and coloured by NO concentration (colour bar). (B) Mixture runs ( $\alpha$ -pinene+isoprene+  $\beta$ -caryophyllene), RH = 40% and ~10 - 20 pptv NO, particle formation rate ( $J_{1.7}$ ) as a function of OOM showing the temperature effect. (C) Mixture runs ( $\alpha$ -pinene+isoprene+  $\beta$ -caryophyllene), RH = 40% and ~10 - 20 pptv NO, particle formation rate ( $J_{1.7}$ ) as a function of increasing ion concentration showing the importance of ions for pure biogenic nucleation. Neutral runs were achieved by turning on the high voltage field in the chamber, while increased ion concentration runs were performed using the adjustable  $\pi^+$  beam from the CERN Proton Synchrotron, see Methods section.

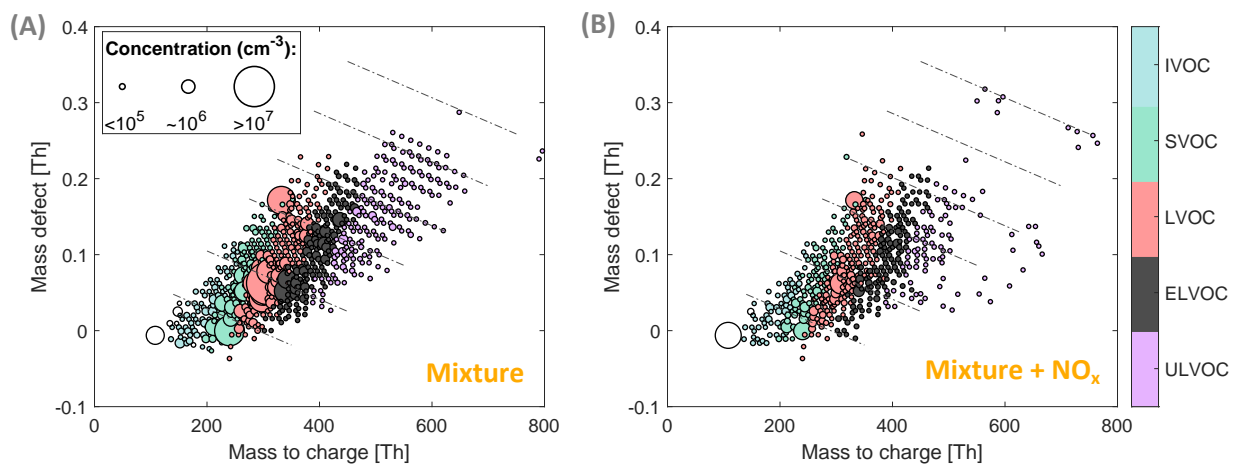

**Figure S7 Chemical composition of BVOC oxidation results measured with  $\text{NO}_3$ -CIMS in the absence and presence of  $\text{NO}_x$ .** Here we show example of (A) mixture runs  $\alpha$ -pinene+isoprene+  $\beta$ -caryophyllene (run #14) and (B)  $\alpha$ -pinene+isoprene+  $\beta$ -caryophyllene with  $\sim 30$  pptv NO (run #22).

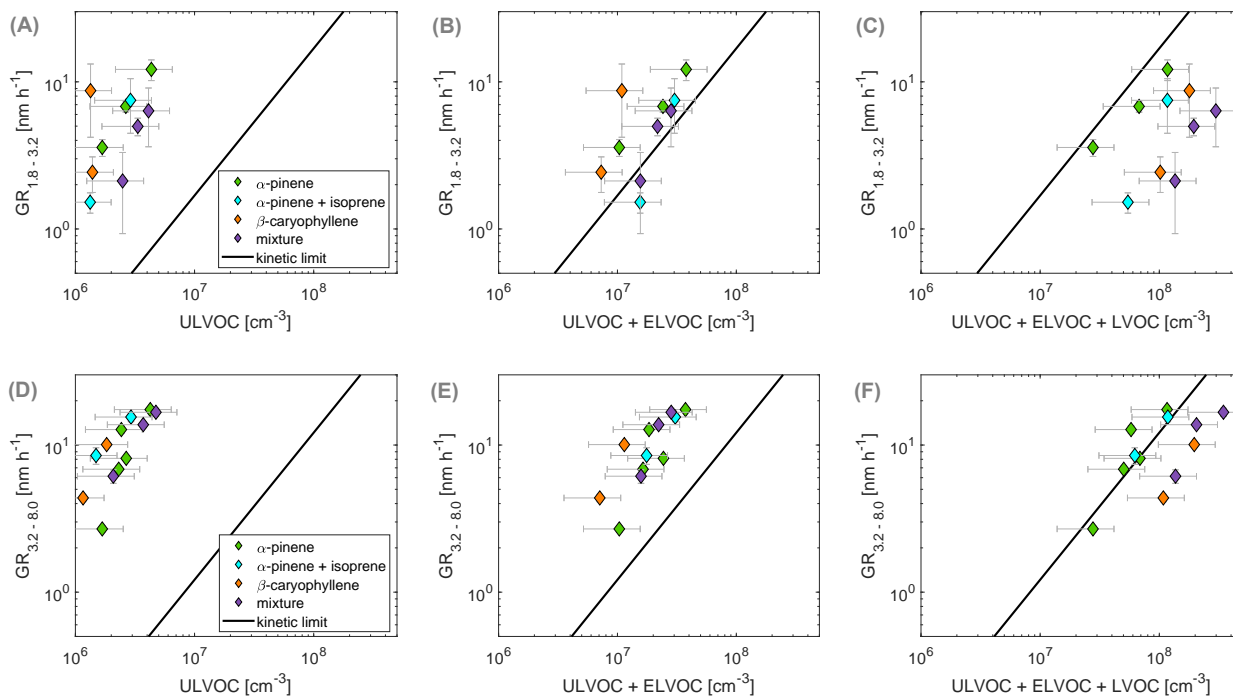

**Figure S8 Particle growth rates as a function of vapour concentrations in different volatility classes.** Particle growth rates during ozonolysis experiments for particle diameters between 1.8 and 3.2 nm as a function of (A) ULVOC, (B) ELVOC + ULVOC and (C) LVOC + ELVOC + ULVOC concentrations measured with  $\text{NO}_3$ -CIMS and PTR3 and particle growth rates during ozonolysis experiments for particle diameters between 3.2 and 8 nm as a function of (D) ULVOC, (E) ELVOC + ULVOC and (F) LVOC + ELVOC + ULVOC. The black line shows the geometric limit of kinetic condensational growth (41).

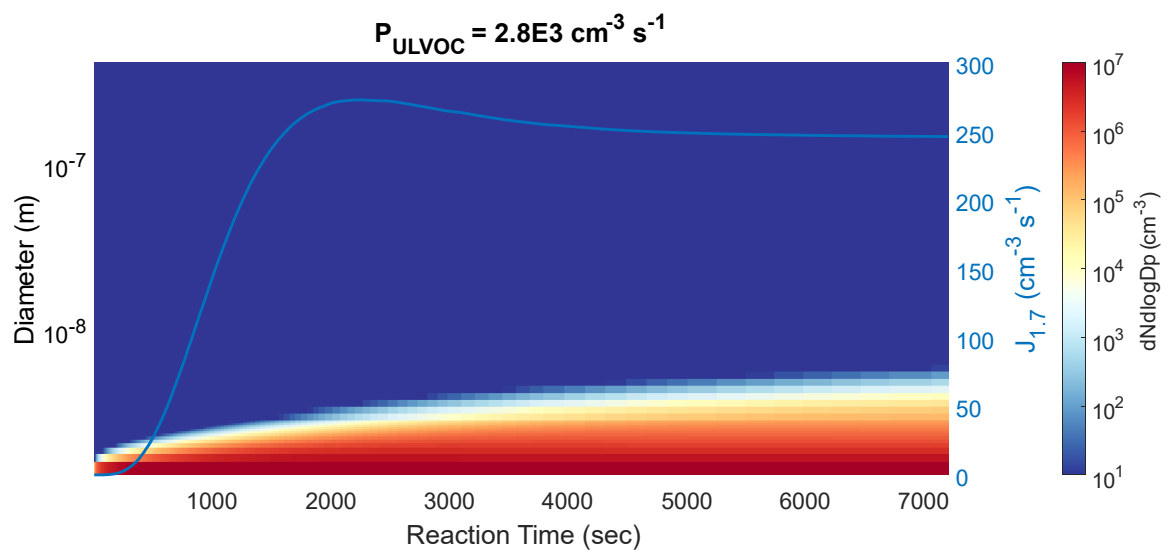

**Figure S9 Model results example of kinetic limit ULVOC nucleation at constant production rate of ULVOC =  $2.8 \times 10^3 \text{ cm}^{-3} \text{ s}^{-1}$ .** The calculation excludes evaporation to simulate the kinetic limit. The particle concentration is given as contour and  $J_{1.7}$  as blue line (right axis).

## REFERENCES AND NOTES

1. A. B. Guenther, X. Jiang, C. L. Heald, T. Sakulyanontvittaya, T. Duhl, L. K. Emmons, X. Wang, The Model of Emissions of Gases and Aerosols from Nature version 2.1 (MEGAN2.1): An extended and updated framework for modeling biogenic emissions. *Geosci. Model Dev.* **5**, 1471–1492 (2012).
2. J. Kirkby, J. Duplissy, K. Sengupta, C. Frege, H. Gordon, C. Williamson, M. Heinritzi, M. Simon, C. Yan, J. Almeida, J. Tröstl, T. Nieminen, I. K. Ortega, R. Wagner, A. Adamov, A. Amorim, A.K. Bernhammer, F. Bianchi, M. Breitenlechner, S. Brilke, X. Chen, J. Craven, A. Dias, S. Ehrhart, R. C. Flagan, A. Franchin, C. Fuchs, R. Guida, J. Hakala, C. R. Hoyle, T. Jokinen, H. Junninen, J. Kangasluoma, J. Kim, M. Krapf, A. Kürten, A. Laaksonen, K. Lehtipalo, V. Makhmutov, S. Mathot, U. Molteni, A. Onnela, O. Peräkylä, F. Piel, T. Petäjä, A. P. Praplan, K. Pringle, A. Rap, N. A. D. Richards, I. Riipinen, M. P. Rissanen, L. Rondo, N. Sarnela, S. Schobesberger, C. E. Scott, J. H. Seinfeld, M. Sipilä, G. Steiner, Y. Stozhkov, F. Stratmann, A. Tomé, A. Virtanen, A. L. Vogel, A. C. Wagner, P. E. Wagner, E. Weingartner, D. Wimmer, P. M. Winkler, P. Ye, X. Zhang, A. Hansel, J. Dommen, N. M. Donahue, D. R. Worsnop, U. Baltensperger, M. Kulmala, K. S. Carslaw, J. Curtius, Ion-induced nucleation of pure biogenic particles. *Nature* **533**, 521–526 (2016).
3. F. Bianchi, H. Junninen, A. Bigi, V. A. Sinclair, L. Dada, C. R. Hoyle, Q. Zha, L. Yao, L. R. Ahonen, P. Bonasoni, S. Buenrostro Mazon, M. Hutterli, P. Laj, K. Lehtipalo, J. Kangasluoma, V.M. Kerminen, J. Kontkanen, A. Marinoni, S. Mirme, U. Molteni, T. Petäjä, M. Riva, C. Rose, K. Sellegri, C. Yan, D. R. Worsnop, M. Kulmala, U. Baltensperger, J. Dommen, Biogenic particles formed in the Himalaya as an important source of free tropospheric aerosols. *Nat. Geosci.* **14**, 4–9 (2021).
4. K. R. Daellenbach, G. Uzu, J. Jiang, L.E. Cassagnes, Z. Leni, A. Vlachou, G. Stefenelli, F. Canonaco, S. Weber, A. Segers, J. J. P. Kuenen, M. Schaap, O. Favez, A. Albinet, S. Aksoyoglu, J. Dommen, U. Baltensperger, M. Geiser, I. el Haddad, J.L. Jaffrezo, A. S. H. Prévôt, Sources of particulate-matter air pollution and its oxidative potential in Europe. *Nature* **587**, 414–419 (2020).
5. S. Aksoyoglu, J. Jiang, G. Ciarelli, U. Baltensperger, A. S. H. Prévôt, Role of ammonia in European air quality with changing land and ship emissions between 1990 and 2030. *Atmos. Chem. Phys.* **20**, 15665–15680 (2020).

6. D. P. van Vuuren, J. Edmonds, M. Kainuma, K. Riahi, A. Thomson, K. Hibbard, G. C. Hurtt, T. Kram, V. Krey, J.F. Lamarque, T. Masui, M. Meinshausen, N. Nakicenovic, S. J. Smith, S. K. Rose, The representative concentration pathways: An overview. *Clim. Change* **109**, 5–31 (2011).
7. D. F. Zhao, A. Buchholz, R. Tillmann, E. Kleist, C. Wu, F. Rubach, A. Kiendler-Scharr, Y. Rudich, J. Wildt, T. F. Mentel, Environmental conditions regulate the impact of plants on cloud formation. *Nat. Commun.* **8**, 14067 (2017).
8. C. Faiola, D. Taipale, Impact of insect herbivory on plant stress volatile emissions from trees: A synthesis of quantitative measurements and recommendations for future research. *Atmospheric Environ. X* **5**, 100060 (2020).
9. H. Hellén, A. P. Praplan, T. Tykkä, A. Helin, S. Schallhart, P. P. Schiestl-Aalto, J. Bäck, H. Hakola, Sesquiterpenes and oxygenated sesquiterpenes dominate the VOC (C5–C20) emissions of downy birches. *Atmos. Chem. Phys.* **21**, 8045–8066 (2021).
10. T. R. Duhl, D. Helmig, A. Guenther, Sesquiterpene emissions from vegetation: A review. *Biogeosciences* **5**, 761–777 (2008).
11. L. Gao, J. Song, C. Mohr, W. Huang, M. Vallon, F. Jiang, T. Leisner, H. Saathoff, Kinetics, SOA yields, and chemical composition of secondary organic aerosol from  $\beta$ -caryophyllene ozonolysis with and without nitrogen oxides between 213 and 313 K. *Atmos. Chem. Phys.* **22**, 6001–6020 (2022).
12. J. P. Greenberg, A. B. Guenther, G. Pétron, C. Wiedinmyer, O. Vega, L. V. Gatti, J. Tota, G. Fisch, Biogenic VOC emissions from forested Amazonian landscapes. *Glob. Chang. Biol.* **10**, 651–662 (2004).
13. P. Messina, J. Lathièrre, K. Sindelarova, N. Vuichard, C. Granier, J. Ghattas, A. Cozic, D. A. Hauglustaine, Global biogenic volatile organic compound emissions in the ORCHIDEE and MEGAN models and sensitivity to key parameters. *Atmos. Chem. Phys.* **16**, 14169–14202 (2016).
14. K. Jardine, A. Yañez Serrano, A. Arneth, L. Abrell, A. Jardine, J. van Haren, P. Artaxo, L. V. Rizzo, F. Y. Ishida, T. Karl, J. Kesselmeier, S. Saleska, T. Huxman, Within-canopy sesquiterpene ozonolysis in Amazonia. *J. Geophys. Res. Atmos.* **116**, 10.1029/2011JD016243 (2011).

15. E. Bourtsoukidis, T. Behrendt, A. M. Yañez-Serrano, H. Hellén, E. Diamantopoulos, E. Catão, K. Ashworth, A. Pozzer, C. A. Quesada, D. L. Martins, M. Sá, A. Araujo, J. Brito, P. Artaxo, J. Kesselmeier, J. Lelieveld, J. Williams, Strong sesquiterpene emissions from Amazonian soils. *Nat. Commun.* **9**, 2226 (2018).
16. L. M. F. Barreira, A. Ylisirniö, I. Pullinen, A. Buchholz, Z. Li, H. Lipp, H. Junninen, U. Hörrak, S. M. Noe, A. Krasnova, D. Krasnov, K. Kask, E. Talts, Ü. Niinemets, J. Ruiz-Jimenez, S. Schobesberger, The importance of sesquiterpene oxidation products for secondary organic aerosol formation in a springtime hemiboreal forest. *Atmos. Chem. Phys.* **21**, 11781–11800 (2021).
17. T. Sakulyanontvittaya, A. Guenther, D. Helmig, J. Milford, C. Wiedinmyer, Secondary organic aerosol from sesquiterpene and monoterpene emissions in the United States. *Environ. Sci. Technol.* **42**, 8784–8790 (2008).
18. L. D. Yee, G. Isaacman-VanWertz, R. A. Wernis, M. Meng, V. Rivera, N. M. Kreisberg, S. V. Hering, M. S. Bering, M. Glasius, M. A. Upshur, A. Gray Bé, R. J. Thomson, F. M. Geiger, J. H. Offenberg, M. Lewandowski, I. Kourtchev, M. Kalberer, S. de Sá, S. T. Martin, M. L. Alexander, B. B. Palm, W. Hu, P. Campuzano-Jost, D. A. Day, J. L. Jimenez, Y. Liu, K. A. McKinney, P. Artaxo, J. Viegas, A. Manzi, M. B. Oliveira, R. de Souza, L. A. T. Machado, K. Longo, A. H. Goldstein, Observations of sesquiterpenes and their oxidation products in central Amazonia during the wet and dry seasons. *Atmos. Chem. Phys.* **18**, 10433–10457 (2018).
19. H. Junninen, L. Ahonen, F. Bianchi, L. Quéléver, S. Schallhart, L. Dada, H. E. Manninen, K. Leino, J. Lampilahti, S. Buenrostro Mazon, P. Rantala, M. Rätty, J. Kontkanen, S. Negri, D. Aliaga, O. Garmash, P. Alekseychik, H. Lipp, K. Tamme, J. Levula, M. Sipilä, M. Ehn, D. Worsnop, S. Zilitinkevich, I. Mammarella, J. Rinne, T. Vesala, T. Petäjä, V.M. Kerminen, M. Kulmala, Terpene emissions from boreal wetlands can initiate stronger atmospheric new particle formation than boreal forests. *Commun. Earth Environ.* **3**, 93 (2022).
20. M. Boy, T. Karl, A. Turnipseed, R. L. Mauldin, E. Kosciuch, J. Greenberg, J. Rathbone, J. Smith, A. Held, K. Barsanti, B. Wehner, S. Bauer, A. Wiedensohler, B. Bonn, M. Kulmala, A. Guenther, New particle formation in the front range of the Colorado Rocky Mountains. *Atmos. Chem. Phys.* **8**, 1577–1590 (2008).

21. B. Bonn, G. K. Moortgat, Sesquiterpene ozonolysis: Origin of atmospheric new particle formation from biogenic hydrocarbons. *Geophys. Res. Lett.* **30**, 10.1029/2003GL017000 (2003).
22. B. Bonn, A. Hirsikko, H. Hakola, T. Kurtén, L. Laakso, M. Boy, M. Dal Maso, J. M. Mäkelä, M. Kulmala, Ambient sesquiterpene concentration and its link to air ion measurements. *Atmos. Chem. Phys.* **7**, 2893–2916 (2007).
23. A. L. Vogel, J. Schneider, C. Müller-Tautges, T. Klimach, T. Hoffmann, Aerosol chemistry resolved by mass spectrometry: Insights into particle growth after ambient new particle formation. *Environ. Sci. Technol.* **50**, 10814–10822 (2016).
24. L. Pichelstorfer, D. Stolzenburg, J. Ortega, T. Karl, H. Kokkola, A. Laakso, K. E. J. Lehtinen, J. N. Smith, P. H. McMurry, P. M. Winkler, Resolving nanoparticle growth mechanisms from size- and time-dependent growth rate analysis. *Atmos. Chem. Phys.* **18**, 1307–1323 (2018).
25. M. Heinritzi, L. Dada, M. Simon, D. Stolzenburg, A. C. Wagner, L. Fischer, L. R. Ahonen, S. Amanatidis, R. Baalbaki, A. Baccarini, P. S. Bauer, B. Baumgartner, F. Bianchi, S. Brilke, D. Chen, R. Chiu, A. Dias, J. Dommen, J. Duplissy, H. Finkenzeller, C. Frege, C. Fuchs, O. Garmash, H. Gordon, M. Granzin, I. el Haddad, X. He, J. Helm, V. Hofbauer, C. R. Hoyle, J. Kangasluoma, T. Keber, C. Kim, A. Kürten, H. Lamkaddam, T. M. Laurila, J. Lampilahti, C. P. Lee, K. Lehtipalo, M. Leiminger, H. Mai, V. Makhmutov, H. E. Manninen, R. Marten, S. Mathot, R. L. Mauldin, B. Mentler, U. Molteni, T. Müller, W. Nie, T. Nieminen, A. Onnela, E. Partoll, M. Passananti, T. Petäjä, J. Pfeifer, V. Pospisilova, L. L. J. Quéléver, M. P. Rissanen, C. Rose, S. Schobesberger, W. Scholz, K. Scholze, M. Sipilä, G. Steiner, Y. Stozhkov, C. Tauber, Y. J. Tham, M. Vazquez-Pufleau, A. Virtanen, A. L. Vogel, R. Volkamer, R. Wagner, M. Wang, L. Weitz, D. Wimmer, M. Xiao, C. Yan, P. Ye, Q. Zha, X. Zhou, A. Amorim, U. Baltensperger, A. Hansel, M. Kulmala, A. Tomé, P. M. Winkler, D. R. Worsnop, N. M. Donahue, J. Kirkby, J. Curtius, Molecular understanding of the suppression of new-particle formation by isoprene. *Atmos. Chem. Phys.* **20**, 11809–11821 (2020).
26. F. Bianchi, T. Kurtén, M. Riva, C. Mohr, M. P. Rissanen, P. Roldin, T. Berndt, J. D. Crouse, P. O. Wennberg, T. F. Mentel, J. Wildt, H. Junninen, T. Jokinen, M. Kulmala, D. R. Worsnop, J. A. Thornton, N. Donahue, H. G. Kjaergaard, M. Ehn, Highly oxygenated organic molecules (HOM) from gas-phase



autoxidation involving peroxy radicals: A key contributor to atmospheric aerosol. *Chem. Rev.* **119**, 3472–3509 (2019).

27. J. D. Crouse, L. B. Nielsen, S. Jørgensen, H. G. Kjaergaard, P. O. Wennberg, Autoxidation of organic compounds in the atmosphere. *J. Phys. Chem. Lett.* **4**, 3513–3520 (2013).
28. G. McFiggans, T. F. Mentel, J. Wildt, I. Pullinen, S. Kang, E. Kleist, S. Schmitt, M. Springer, R. Tillmann, C. Wu, D. Zhao, M. Hallquist, C. Faxon, M. le Breton, A. M. Hallquist, D. Simpson, R. Bergström, M. E. Jenkin, M. Ehn, J. A. Thornton, M. R. Alfarra, T. J. Bannan, C. J. Percival, M. Priestley, D. Topping, A. Kiendler-Scharr, Secondary organic aerosol reduced by mixture of atmospheric vapours. *Nature* **565**, 587–593 (2019).
29. J. Tröstl, W. K. Chuang, H. Gordon, M. Heinritzi, C. Yan, U. Molteni, L. Ahlm, C. Frege, F. Bianchi, R. Wagner, M. Simon, K. Lehtipalo, C. Williamson, J. S. Craven, J. Duplissy, A. Adamov, J. Almeida, A.K. Bernhammer, M. Breitenlechner, S. Brilke, A. Dias, S. Ehrhart, R. C. Flagan, A. Franchin, C. Fuchs, R. Guida, M. Gysel, A. Hansel, C. R. Hoyle, T. Jokinen, H. Junninen, J. Kangasluoma, H. Keskinen, J. Kim, M. Krapf, A. Kürten, A. Laaksonen, M. Lawler, M. Leiminger, S. Mathot, O. Möhler, T. Nieminen, A. Onnela, T. Petäjä, F. M. Piel, P. Miettinen, M. P. Rissanen, L. Rondo, N. Sarnela, S. Schobesberger, K. Sengupta, M. Sipilä, J. N. Smith, G. Steiner, A. Tomè, A. Virtanen, A. C. Wagner, E. Weingartner, D. Wimmer, P. M. Winkler, P. Ye, K. S. Carslaw, J. Curtius, J. Dommen, J. Kirkby, M. Kulmala, I. Riipinen, D. R. Worsnop, N. M. Donahue, U. Baltensperger, The role of low-volatility organic compounds in initial particle growth in the atmosphere. *Nature* **533**, 527–531 (2016).
30. M. Simon, L. Dada, M. Heinritzi, W. Scholz, D. Stolzenburg, L. Fischer, A. C. Wagner, A. Kürten, B. Rörup, X.C. He, J. Almeida, R. Baalbaki, A. Baccarini, P. S. Bauer, L. Beck, A. Bergen, F. Bianchi, S. Bräklings, S. Brilke, L. Caudillo, D. Chen, B. Chu, A. Dias, D. C. Draper, J. Duplissy, I. el-Haddad, H. Finkenzeller, C. Frege, L. Gonzalez-Carracedo, H. Gordon, M. Granzin, J. Hakala, V. Hofbauer, C. R. Hoyle, C. Kim, W. Kong, H. Lamkaddam, C. P. Lee, K. Lehtipalo, M. Leiminger, H. Mai, H. E. Manninen, G. Marie, R. Marten, B. Mentler, U. Molteni, L. Nichman, W. Nie, A. Ojdanic, A. Onnela, E. Partoll, T. Petäjä, J. Pfeifer, M. Philipov, L. L. J. Quéléver, A. Ranjithkumar, M. P. Rissanen, S. Schallhart, S. Schobesberger, S. Schuchmann, J. Shen, M. Sipilä, G. Steiner, Y. Stozhkov, C. Tauber, Y. J. Tham, A. R. Tomé, M. Vazquez-Pufleau, A. L. Vogel, R. Wagner, M. Wang, D. S. Wang, Y. Wang,

- S. K. Weber, Y. Wu, M. Xiao, C. Yan, P. Ye, Q. Ye, M. Zauner-Wieczorek, X. Zhou, U. Baltensperger, J. Dommen, R. C. Flagan, A. Hansel, M. Kulmala, R. Volkamer, P. M. Winkler, D. R. Worsnop, N. M. Donahue, J. Kirkby, J. Curtius, Molecular understanding of new-particle formation from  $\alpha$ -pinene between  $-50$  and  $+25^{\circ}\text{C}$ . *Atmos. Chem. Phys.* **20**, 9183–9207 (2020).
31. S. Richters, H. Herrmann, T. Berndt, Highly oxidized RO<sub>2</sub> radicals and consecutive products from the ozonolysis of three sesquiterpenes. *Environ. Sci. Technol.* **50**, 2354–2362 (2016).
32. D. Stolzenburg, L. Fischer, A. L. Vogel, M. Heinritzi, M. Schervish, M. Simon, A. C. Wagner, L. Dada, L. R. Ahonen, A. Amorim, A. Baccarini, P. S. Bauer, B. Baumgartner, A. Bergen, F. Bianchi, M. Breitenlechner, S. Brilke, S. Buenrostro Mazon, D. Chen, A. Dias, D. C. Draper, J. Duplissy, I. el Haddad, H. Finkenzeller, C. Frege, C. Fuchs, O. Garmash, H. Gordon, X. He, J. Helm, V. Hofbauer, C. R. Hoyle, C. Kim, J. Kirkby, J. Kontkanen, A. Kürten, J. Lampilahti, M. Lawler, K. Lehtipalo, M. Leiminger, H. Mai, S. Mathot, B. Mentler, U. Molteni, W. Nie, T. Nieminen, J. B. Nowak, A. Ojdanic, A. Onnela, M. Passananti, T. Petäjä, L. L. J. Quéléver, M. P. Rissanen, N. Sarnela, S. Schallhart, C. Tauber, A. Tomé, R. Wagner, M. Wang, L. Weitz, D. Wimmer, M. Xiao, C. Yan, P. Ye, Q. Zha, U. Baltensperger, J. Curtius, J. Dommen, R. C. Flagan, M. Kulmala, J. N. Smith, D. R. Worsnop, A. Hansel, N. M. Donahue, P. M. Winkler, Rapid growth of organic aerosol nanoparticles over a wide tropospheric temperature range. *Proc. Natl. Acad. Sci. U.S.A.* **115**, 9122–9127 (2018).
33. U. Molteni, M. Simon, M. Heinritzi, C. R. Hoyle, A.K. Bernhammer, F. Bianchi, M. Breitenlechner, S. Brilke, A. Dias, J. Duplissy, C. Frege, H. Gordon, C. Heyn, T. Jokinen, A. Kürten, K. Lehtipalo, V. Makhmutov, T. Petäjä, S. M. Pieber, A. P. Praplan, S. Schobesberger, G. Steiner, Y. Stozhkov, A. Tomé, J. Tröstl, A. C. Wagner, R. Wagner, C. Williamson, C. Yan, U. Baltensperger, J. Curtius, N. M. Donahue, A. Hansel, J. Kirkby, M. Kulmala, D. R. Worsnop, J. Dommen, Formation of highly oxygenated organic molecules from  $\alpha$ -pinene ozonolysis: Chemical characteristics, mechanism, and kinetic model development. *ACS Earth Space Chem.* **3**, 873–883 (2019).
34. Y. Luo, O. Garmash, H. Li, F. Graeffe, A. P. Praplan, A. Liikanen, Y. Zhang, M. Meder, O. Peräkylä, J. Peñuelas, A. M. Yáñez-Serrano, M. Ehn, Oxidation product characterization from ozonolysis of the diterpene ent-kaurene. *Atmos. Chem. Phys.* **22**, 5619–5637 (2022).

35. M. Schervish, N. M. Donahue, Peroxy radical chemistry and the volatility basis set. *Atmos. Chem. Phys.* **20**, 1183–1199 (2020).
36. C. Yan, W. Nie, A. L. Vogel, L. Dada, K. Lehtipalo, D. Stolzenburg, R. Wagner, M. P. Rissanen, M. Xiao, L. Ahonen, L. Fischer, C. Rose, F. Bianchi, H. Gordon, M. Simon, M. Heinritzi, O. Garmash, P. Roldin, A. Dias, P. Ye, V. Hofbauer, A. Amorim, P. S. Bauer, A. Bergen, A.-K. Bernhammer, M. Breitenlechner, S. Brilke, A. Buchholz, S. Buenrostro Mazon, M. R. Canagaratna, X. Chen, A. Ding, J. Dommen, D. C. Draper, J. Duplissy, C. Frege, C. Heyn, R. Guida, J. Hakala, L. Heikkinen, C. R. Hoyle, T. Jokinen, J. Kangasluoma, J. Kirkby, J. Kontkanen, A. Kürten, M. J. Lawler, H. Mai, S. Mathot, R. L. Mauldin, III, U. Molteni, L. Nichman, T. Nieminen, J. Nowak, A. Ojdanic, A. Onnela, A. Pajunoja, T. Petäjä, F. Piel, L. L. J. Quéléver, N. Sarnela, S. Schallhart, K. Sengupta, M. Sipilä, A. Tomé, J. Tröstl, O. Väisänen, A. C. Wagner, A. Ylisirniö, Q. Zha, U. Baltensperger, K. S. Carslaw, J. Curtius, R. C. Flagan, A. Hansel, I. Riipinen, J. N. Smith, A. Virtanen, P. M. Winkler, N. M. Donahue, V.-M. Kerminen, M. Kulmala, M. Ehn, D. R. Worsnop, Size-dependent influence of NO<sub>x</sub> on the growth rates of organic aerosol particles. *Sci. Adv.* **6**, eaay4945 (2020).
37. K. Lehtipalo, C. Yan, L. Dada, F. Bianchi, M. Xiao, R. Wagner, D. Stolzenburg, L. R. Ahonen, A. Amorim, A. Baccharini, P. S. Bauer, B. Baumgartner, A. Bergen, A.-K. Bernhammer, M. Breitenlechner, S. Brilke, A. Buchholz, S. B. Mazon, D. Chen, X. Chen, A. Dias, J. Dommen, D. C. Draper, J. Duplissy, M. Ehn, H. Finkenzeller, L. Fischer, C. Frege, C. Fuchs, O. Garmash, H. Gordon, J. Hakala, X. He, L. Heikkinen, M. Heinritzi, J. C. Helm, V. Hofbauer, C. R. Hoyle, T. Jokinen, J. Kangasluoma, V.-M. Kerminen, C. Kim, J. Kirkby, J. Kontkanen, A. Kürten, M. J. Lawler, H. Mai, S. Mathot, R. L. Mauldin, III, U. Molteni, L. Nichman, W. Nie, T. Nieminen, A. Ojdanic, A. Onnela, M. Passananti, T. Petäjä, F. Piel, V. Pospisilova, L. L. J. Quéléver, M. P. Rissanen, C. Rose, N. Sarnela, S. Schallhart, S. Schuchmann, K. Sengupta, M. Simon, M. Sipilä, C. Tauber, A. Tomé, J. Tröstl, O. Väisänen, A. L. Vogel, R. Volkamer, A. C. Wagner, M. Wang, L. Weitz, D. Wimmer, P. Ye, A. Ylisirniö, Q. Zha, K. S. Carslaw, J. Curtius, N. M. Donahue, R. C. Flagan, A. Hansel, I. Riipinen, A. Virtanen, P. M. Winkler, U. Baltensperger, M. Kulmala, D. R. Worsnop, Multicomponent new particle formation from sulfuric acid, ammonia, and biogenic vapors. *Sci. Adv.* **4**, eaau5363 (2018).
38. Q. Ye, M. Wang, V. Hofbauer, D. Stolzenburg, D. Chen, M. Schervish, A. Vogel, R. L. Mauldin, R. Baalbaki, S. Brilke, L. Dada, A. Dias, J. Duplissy, I. el Haddad, H. Finkenzeller, L. Fischer, X. He, C.

Kim, A. Kürten, H. Lamkaddam, C. P. Lee, K. Lehtipalo, M. Leiminger, H. E. Manninen, R. Marten, B. Mentler, E. Partoll, T. Petäjä, M. Rissanen, S. Schobesberger, S. Schuchmann, M. Simon, Y. J. Tham, M. Vazquez-Pufleau, A. C. Wagner, Y. Wang, Y. Wu, M. Xiao, U. Baltensperger, J. Curtius, R. Flagan, J. Kirkby, M. Kulmala, R. Volkamer, P. M. Winkler, D. Worsnop, N. M. Donahue, Molecular composition and volatility of nucleated particles from  $\alpha$ -pinene oxidation between  $-50\text{ }^{\circ}\text{C}$  and  $+25\text{ }^{\circ}\text{C}$ . *Environ. Sci. Technol.* **53**, 12357–12365 (2019).

39. A. Tasoglou, S. N. Pandis, Formation and chemical aging of secondary organic aerosol during the  $\beta$ -caryophyllene oxidation. *Atmos. Chem. Phys.* **15**, 6035–6046 (2015).
40. A. Lee, A. H. Goldstein, M. D. Keywood, S. Gao, V. Varutbangkul, R. Bahreini, N. L. Ng, R. C. Flagan, J. H. Seinfeld, Gas-phase products and secondary aerosol yields from the ozonolysis of ten different terpenes. *J. Geophys. Res. Atmos.* **111**, 10.1029/2005JD006437 (2006).
41. T. Nieminen, K. E. J. Lehtinen, M. Kulmala, Sub-10 nm particle growth by vapor condensation—Effects of vapor molecule size and particle thermal speed. *Atmos. Chem. Phys.* **10**, 9773–9779 (2010).
42. C. Deng, Y. Fu, L. Dada, C. Yan, R. Cai, D. Yang, Y. Zhou, R. Yin, Y. Lu, X. Li, X. Qiao, X. Fan, W. Nie, J. Kontkanen, J. Kangasluoma, B. Chu, A. Ding, V. M. Kerminen, P. Paasonen, D. R. Worsnop, F. Bianchi, Y. Liu, J. Zheng, L. Wang, M. Kulmala, J. Jiang, Seasonal characteristics of new particle formation and growth in urban Beijing. *Environ. Sci. Technol.* **54**, 8547–8557 (2020).
43. B. Zhao, M. Shrivastava, N. M. Donahue, H. Gordon, M. Schervish, J. E. Shilling, R. A. Zaveri, J. Wang, M. O. Andreae, C. Zhao, B. Gaudet, Y. Liu, J. Fan, J. D. Fast, High concentration of ultrafine particles in the Amazon free troposphere produced by organic new particle formation. *Proc. Natl. Acad. Sci. U.S.A.* **117**, 25344–25351 (2020).
44. M. O. Andreae, A. Afchine, R. Albrecht, B. A. Holanda, P. Artaxo, H. M. J. Barbosa, S. Borrmann, M. A. Cecchini, A. Costa, M. Dollner, D. Fütterer, E. Järvinen, T. Jurkat, T. Klimach, T. Konemann, C. Knote, M. Krämer, T. Krisna, L. A. T. Machado, S. Mertes, A. Minikin, C. Pöhlker, M. L. Pöhlker, U. Pöschl, D. Rosenfeld, D. Sauer, H. Schlager, M. Schnaiter, J. Schneider, C. Schulz, A. Spanu, V. B. Sperling, C. Voigt, A. Walser, J. Wang, B. Weinzierl, M. Wendisch, H. Ziereis, Aerosol characteristics

and particle production in the upper troposphere over the Amazon Basin. *Atmos. Chem. Phys.* **18**, 921–961 (2018).

45. M. B. Enghoff, J. O. P. Pedersen, U. I. Uggerhøj, S. M. Paling, H. Svensmark, Aerosol nucleation induced by a high energy particle beam. *Geophys. Res. Lett.* **38**, 10.1029/2011GL047036 (2011).
46. J. Vanhanen, J. Mikkilä, K. Lehtipalo, M. Sipilä, H. E. Manninen, E. Siivola, T. Petäjä, M. Kulmala, Particle size magnifier for nano-CN detection *Aerosol Sci. Tech.* **45**, 533–542 (2011).
47. K. Lehtipalo, L. R. Ahonen, R. Baalbaki, J. Sulo, T. Chan, T. Laurila, L. Dada, J. Duplissy, E. Miettinen, J. Vanhanen, J. Kangasluoma, M. Kulmala, T. Petäjä, T. Jokinen, The standard operating procedure for airmodus particle size magnifier and nano-condensation nucleus counter. *J. Aerosol Sci.* **159**, 105896 (2022).
48. D. Stolzenburg, G. Steiner, P. M. Winkler, A DMA-train for precision measurement of sub-10 nm aerosol dynamics. *Atmos. Meas. Tech.* **10**, 1639–1651 (2017).
49. S. Mirme, A. Mirme, The mathematical principles and design of the NAIS—A spectrometer for the measurement of cluster ion and nanometer aerosol size distributions. *Atmos. Meas. Tech.* **6**, 1061–1071 (2013).
50. A. Kurten, T. Jokinen, M. Simon, M. Sipilä, N. Sarnela, H. Junninen, A. Adamov, J. Almeida, A. Amorim, F. Bianchi, M. Breitenlechner, J. Dommen, N. M. Donahue, J. Duplissy, S. Ehrhart, R. C. Flagan, A. Franchin, J. Hakala, A. Hansel, M. Heinritzi, M. Hutterli, J. Kangasluoma, J. Kirkby, A. Laaksonen, K. Lehtipalo, M. Leiminger, V. Makhmutov, S. Mathot, A. Onnela, T. Petäjä, A. P. Praplan, F. Riccobono, M. P. Rissanen, L. Rondo, S. Schobesberger, J. H. Seinfeld, G. Steiner, A. Tomé, J. Tröstl, P. M. Winkler, C. Williamson, D. Wimmer, P. Ye, U. Baltensperger, K. S. Carslaw, M. Kulmala, D. R. Worsnop, J. Curtius, Neutral molecular cluster formation of sulfuric acid-dimethylamine observed in real time under atmospheric conditions. *Proc. Natl. Acad. Sci. U.S.A.* **111**, 15019–15024 (2014).
51. F. L. Eisele, D. J. Tanner, Measurement of the gas phase concentration of H<sub>2</sub>SO<sub>4</sub> and methane sulfonic acid and estimates of H<sub>2</sub>SO<sub>4</sub> production and loss in the atmosphere. *J. Geophys. Res. Atmos.* **98**, 9001–9010 (1993).

52. A. Kürten, L. Rondo, S. Ehrhart, J. Curtius, Calibration of a chemical ionization mass spectrometer for the measurement of gaseous sulfuric acid. *J. Phys. Chem.* **116**, 6375–6386 (2012).
53. M. Ehn, E. Kleist, H. Junninen, T. Petäjä, G. Lönn, S. Schobesberger, M. Dal Maso, A. Trimborn, M. Kulmala, D. R. Worsnop, A. Wahner, J. Wildt, T. F. Mentel, Gas phase formation of extremely oxidized pinene reaction products in chamber and ambient air. *Atmos. Chem. Phys.* **12**, 5113–5127 (2012).
54. M. Heinritzi, M. Simon, G. Steiner, A. C. Wagner, A. Kürten, A. Hansel, J. Curtius, Characterization of the mass-dependent transmission efficiency of a CIMS. *Atmos. Meas. Tech.* **9**, 1449–1460 (2016).
55. M. Riva, L. Heikkinen, D. M. Bell, O. Peräkylä, Q. Zha, S. Schallhart, M. P. Rissanen, D. Imre, T. Petäjä, J. A. Thornton, A. Zelenyuk, M. Ehn, Chemical transformations in monoterpene-derived organic aerosol enhanced by inorganic composition. *Science* **2**, 2 (2019).
56. M. Breitenlechner, L. Fischer, M. Hainer, M. Heinritzi, J. Curtius, A. Hansel, PTR3: An instrument for studying the lifecycle of reactive organic carbon in the atmosphere. *Anal. Chem.* **89**, 5824–5831 (2017).
57. M. Riva, P. Rantala, J. E. Krechmer, O. Peräkylä, Y. Zhang, L. Heikkinen, O. Garmash, C. Yan, M. Kulmala, D. Worsnop, M. Ehn, Evaluating the performance of five different chemical ionization techniques for detecting gaseous oxygenated organic species. *Atmos. Meas. Tech.* **12**, 2403–2421 (2019).
58. F. D. Lopez-Hilfiker, C. Mohr, M. Ehn, F. Rubach, E. Kleist, J. Wildt, T. F. Mentel, A. Lutz, M. Hallquist, D. Worsnop, J. A. Thornton, A novel method for online analysis of gas and particle composition: Description and evaluation of a Filter Inlet for Gases and AEROSols (FIGAERO). *Atmos. Meas. Tech.* **7**, 983–1001 (2014).
59. H. Stark, R. L. N. Yatavelli, S. L. Thompson, H. Kang, J. E. Krechmer, J. R. Kimmel, B. B. Palm, W. Hu, P. L. Hayes, D. A. Day, P. Campuzano-Jost, M. R. Canagaratna, J. T. Jayne, D. R. Worsnop, J. L. Jimenez, Impact of thermal decomposition on thermal desorption instruments: Advantage of thermogram analysis for quantifying volatility distributions of organic species. *Environ. Sci. Technol.* **51**, 8491–8500 (2017).

60. M. Wang, D. Chen, M. Xiao, Q. Ye, D. Stolzenburg, V. Hofbauer, P. Ye, A. L. Vogel, R. L. Mauldin III, A. Amorim, A. Baccharini, B. Baumgartner, S. Brilke, L. Dada, A. Dias, J. Duplissy, H. Finkenzeller, O. Garmash, X.C. He, C. R. Hoyle, C. Kim, A. Kvashnin, K. Lehtipalo, L. Fischer, U. Molteni, T. Petäjä, V. Pospisilova, L. L. J. Quéléver, M. Rissanen, M. Simon, C. Tauber, A. Tomé, A. C. Wagner, L. Weitz, R. Volkamer, P. M. Winkler, J. Kirkby, D. R. Worsnop, M. Kulmala, U. Baltensperger, J. Dommen, I. el-Haddad, N. M. Donahue, Photo-oxidation of aromatic hydrocarbons produces low-volatility organic compounds. *Environ. Sci. Technol.* **54**, 7911–7921 (2020).
61. M. Wang, L. Yao, J. Zheng, X.K. Wang, J.M. Chen, X. Yang, D.R. Worsnop, N.M. Donahue, L. Wang, Reactions of atmospheric particulate stabilized criegee intermediates lead to high-molecular-weight aerosol components. *Environ. Sci. Technol.* **50**, 5702–5710 (2016).
62. D. W. Fahey, R.S. Gao, O. Möhler, H. Saathoff, C. Schiller, V. Ebert, M. Krämer, T. Peter, N. Amarouche, L. M. Avallone, R. Bauer, Z. Bozóki, L. E. Christensen, S. M. Davis, G. Durrý, C. Dyroff, R. L. Herman, S. Hunsmann, S. M. Khaykin, P. Mackrodt, J. Meyer, J. B. Smith, N. Spelten, R. F. Troy, H. Vömel, S. Wagner, F. G. Wienhold, The AquaVIT-1 intercomparison of atmospheric water vapor measurement techniques. *Atmos. Meas. Tech.* **7**, 3177–3213 (2014).
63. A. Dias, S. Ehrhart, A. Vogel, C. Williamson, J. Almeida, J. Kirkby, S. Mathot, S. Mumford, A. Onnela, Temperature uniformity in the CERN CLOUD chamber. *Atmos. Meas. Tech.* **10**, 5075–5088 (2017).
64. J. F. Pankow, W. E. Asher, SIMPOL.1: A simple group contribution method for predicting vapor pressures and enthalpies of vaporization of multifunctional organic compounds. *Atmos. Chem. Phys.* **8**, 2773–2796 (2008).
65. D. Stolzenburg, M. Wang, M. Schervish, N. M. Donahue, Tutorial: Dynamic organic growth modeling with a volatility basis set. *J. Aerosol Sci.* **166**, 106063 (2022).
66. N. M. Donahue, S. A. Epstein, S. N. Pandis, A. L. Robinson, A two-dimensional volatility basis set: 1. Organic-aerosol mixing thermodynamics. *Atmos. Chem. Phys.* **11**, 3303–3318 (2011).

67. T. Kurtén, K. Tiusanen, P. Roldin, M. Rissanen, J.-N. Luy, M. Boy, M. Ehn, N. Donahue,  $\alpha$ -Pinene autoxidation products may not have extremely low saturation vapor pressures despite high O:C ratios. *J. Phys. Chem.* **120**, 2569–2582 (2016).
68. C. Mohr, J. A. Thornton, A. Heitto, F. D. Lopez-Hilfiker, A. Lutz, I. Riipinen, J. Hong, N. M. Donahue, M. Hallquist, T. Petäjä, M. Kulmala, T. Yli-Juuti, Molecular identification of organic vapors driving atmospheric nanoparticle growth. *Nat. Commun.* **10**, 4442 (2019).
69. L. Dada, K. Lehtipalo, J. Kontkanen, T. Nieminen, R. Baalbaki, L. Ahonen, J. Duplissy, C. Yan, B. Chu, T. Petäjä, K. Lehtinen, V. M. Kerminen, M. Kulmala, J. Kangasluoma, Formation and growth of sub-3-nm aerosol particles in experimental chambers. *Nat. Protoc.* **15**, 1013–1040 (2020).
70. J. H. Seinfeld, S. Pandis, *Atmospheric Chemistry and Physics: From Air Pollution to Climate Change* (John Wiley & Sons, ed. 3, 2016).
71. M. Ozon, D. Stolzenburg, L. Dada, A. Seppänen, K. E. J. Lehtinen, Aerosol formation and growth rates from chamber experiments using Kalman smoothing. *Atmos. Chem. Phys.* **21**, 12595–12611 (2021).
72. M. Xiao, C. R. Hoyle, L. Dada, D. Stolzenburg, A. Kürten, M. Wang, H. Lamkaddam, O. Garmash, B. Mentler, U. Molteni, A. Baccharini, M. Simon, X. C. He, K. Lehtipalo, L. R. Ahonen, R. Baalbaki, P. S. Bauer, L. Beck, D. Bell, F. Bianchi, S. Brilke, D. Chen, R. Chiu, A. Dias, J. Duplissy, H. Finkenzeller, H. Gordon, V. Hofbauer, C. Kim, T. K. Koenig, J. Lampilahti, C. P. Lee, Z. Li, H. Mai, V. Makhmutov, H. E. Manninen, R. Marten, S. Mathot, R. L. Mauldin, W. Nie, A. Onnela, E. Partoll, T. Petäjä, J. Pfeifer, V. Pospisilova, L. L. J. Quéléver, M. Rissanen, S. Schobesberger, S. Schuchmann, Y. Stozhkov, C. Tauber, Y. J. Tham, A. Tomé, M. Vazquez-Pufleau, A. C. Wagner, R. Wagner, Y. Wang, L. Weitz, D. Wimmer, Y. Wu, C. Yan, P. Ye, Q. Ye, Q. Zha, X. Zhou, A. Amorim, K. Carslaw, J. Curtius, A. Hansel, R. Volkamer, P. M. Winkler, R. C. Flagan, M. Kulmala, D. R. Worsnop, J. Kirkby, N. M. Donahue, U. Baltensperger, I. el Haddad, J. Dommen, The driving factors of new particle formation and growth in the polluted boundary layer. *Atmos. Chem. Phys.* **21**, 14275–14291 (2021).
73. R. Marten, M. Xiao, B. Rörup, M. Wang, W. Kong, X. C. He, D. Stolzenburg, J. Pfeifer, G. Marie, D.S. Wang, W. Scholz, A. Baccharini, C. P. Lee, A. Amorim, R. Baalbaki, D. M. Bell, B. Bertozzi, L. Caudillo, B. Chu, L. Dada, J. Duplissy, H. Finkenzeller, L. G. Carracedo, M. Granzin, A. Hansel, M.



Heinritzi, V. Hofbauer, D. Kemppainen, A. Kürten, M. Lampimäki, K. Lehtipalo, V. Makhmutov, H. E. Manninen, B. Mentler, T. Petäjä, M. Philippov, J. Shen, M. Simon, Y. Stozhkov, A. Tomé, A.C. Wagner, Y. Wang, S. K. Weber, Y. Wu, M. Zauner-Wieczorek, J. Curtius, M. Kulmala, O. Möhler, R. Volkamer, P. M. Winkler, D. R. Worsnop, J. Dommen, R. C. Flagan, J. Kirkby, N. M. Donahue, H. Lamkaddam, U. Baltensperger, I. el Haddad, Survival of newly formed particles in haze conditions. *Environ. Sci. Atmos.* **2**, 491–499 (2022).

74. S. Iyer, M. P. Rissanen, R. Valiev, S. Barua, J. E. Krechmer, J. Thornton, M. Ehn, T. Kurtén, Molecular mechanism for rapid autoxidation in  $\alpha$ -pinene ozonolysis. *Nat. Commun.* **12**, 878 (2021).

75. K. H. Møller, R. V. Otkjær, J. Chen, H. G. Kjaergaard, Double bonds are key to fast unimolecular reactivity in first-generation monoterpene hydroxy peroxy radicals. *J. Phys. Chem. A* **124**, 2885–2896 (2020).

76. M. P. Rissanen, T. Kurtén, M. Sipilä, J. A. Thornton, J. Kangasluoma, N. Sarnela, H. Junninen, S. Jørgensen, S. Schallhart, M. K. Kajos, R. Taipale, M. Springer, T. F. Mentel, T. Ruuskanen, T. Petäjä, D. R. Worsnop, H. G. Kjaergaard, M. Ehn, The formation of highly oxidized multifunctional products in the ozonolysis of cyclohexene. *J. Am. Chem. Soc.* **136**, 15596–15606 (2014).
